# Supplementary material for: Age Matching of Elderly Liver Grafts With Elderly Recipients Does Not Have a Synergistic Effect on Long-term Outcomes When Both Are Carefully Selected
Source: PubMed Central journal article supplement — Transplant Direct. 2019 Mar 26;5(4):e342. doi: 10.1097/TXD.0000000000000883 (PMC6445659; doi:10.1097/txd.0000000000000883), 2019-03-26
Supplement: txd-5-e342-s002.pdf [file txd-5-e342-s002.pdf]

# Advanced Donor Age and Recipient Age Do Not Interact to Influence Long-Term Outcomes after Liver Transplantation

**Table S1.** Results from a multivariate Cox regression for patient survival after stepwise backward selection of the final set of covariates and extension of the model with stratification of the risk associated with recipient age.

| Variable                               | HR (95%CI)        | p-value |
|----------------------------------------|-------------------|---------|
| Donor age ≥ 70 years (ref.: no)        | 0.79 (0.53-1.17)  | 0.23    |
| Recipient age (ref.: <50 years)        | 1                 | <0.001  |
| 50-59                                  | 1.09 (0.75-1.59)  | 0.65    |
| 60-69                                  | 1.995 (1.40-2.85) | <0.0001 |
| ≥70                                    | 2.001 (1.10-2.66) | 0.02    |
| Donor of thoracic organs (ref.: no)    | 0.57 (0.43-0.77)  | <0.0001 |
| Re-transplantation (no. of transplant) | 1.72 (1.23-2.41)  | 0.002   |
| UNOS (ref.: home)                      | 1                 | <0.0001 |
| ICU                                    | 3.45 (2.23-5.31)  | <0.0001 |
| Ward                                   | 1.95 (1.30-2.93)  | 0.001   |
| Continuous care                        | 1.41 (0.99-2.00)  | 0.053   |
| HCC (ref.: no)                         | 1.79 (1.29-2.48)  | <0.0001 |
| Cold ischemia time (hour)              | 1.1 (1.03-1.17)   | 0.004   |

Results based on 224 events in 763 subjects.

Abbreviations: HCC, hepatocellular carcinoma; UNOS, united network for organ sharing score.

**Table S2.** Univariate and multivariate Cox regression for patient survival at six months and one year after liver transplantation.

| Characteristic                                    | Patient survival at 6 months |         |                           |         | Patient survival at 1 year |         |                           |         |
|---------------------------------------------------|------------------------------|---------|---------------------------|---------|----------------------------|---------|---------------------------|---------|
|                                                   | Univariate                   |         | Multivariate <sup>a</sup> |         | Univariate                 |         | Multivariate <sup>b</sup> |         |
|                                                   | HR (95%CI)                   | p-value | HR (95%CI)                | p-value | HR (95%CI)                 | p-value | HR (95%CI)                | p-value |
| Donor age ≥ 70 years (ref.: no)                   | 0.37 (0.002-583)             | 0.79    | 0.17 (0.0002-211)         | 0.63    | 5.64 (0.04-820)            | 0.50    | 2.93 (0.02-384)           | 0.67    |
| Recipient age (year)                              | 1.04 (1.02-1.07)             | 0.001   | 1.06 (1.03-1.09)          | 0.00008 | 1.04 (1.02-1.07)           | 0.001   | 1.06 (1.03-10.9)          | 0.00003 |
| Age interaction                                   | 1.001 (0.89-1.12)            | 0.98    | 1.01 (0.91-1.13)          | 0.81    | 0.97 (0.89-1.05)           | 0.38    | 0.98 (0.90-1.06)          | 0.53    |
| Donor gender (ref.: male)                         | 1.47 (0.91-2.38)             | 0.12    | -                         | -       | 1.27 (0.83-1.95)           | 0.27    | -                         | -       |
| DCD (ref.: no)                                    | 0.84 (0.39-1.86)             | 0.68    | -                         | -       | 1.10 (0.59-1.23)           | 0.31    | -                         | -       |
| Total warm ischemia <sup>c</sup> (min)            | 1 (0.96-1.03)                | 0.77    | -                         | -       | 1.01 (0.98-1.03)           | 0.71    | -                         | -       |
| Functional warm ischemia <sup>d</sup> (min)       | 0.97 (0.91-10.4)             | 0.44    | -                         | -       | 1 (0.95-1.05)              | 0.96    | -                         | -       |
| Asystolic warm ischemia <sup>e</sup> (min)        | 0.95 (0.86-1.05)             | 0.95    | -                         | -       | 0.98 (0.91-10.6)           | 0.63    | -                         | -       |
| Donor ICU hospitalization (day)                   | 0.99 (0.95-1.03)             | 0.60    | -                         | -       | 0.98 (0.94-1.03)           | 0.42    | -                         | -       |
| Donor BMI                                         | 0.98 (0.91-1.05)             | 0.53    | -                         | -       | 0.99 (0.93-1.06)           | 0.78    | -                         | -       |
| Donor height (cm)                                 | 0.99 (0.96-1.02)             | 0.38    | -                         | -       | 0.99 (0.97-1.01)           | 0.44    | -                         | -       |
| Donor highest AST (IU/L)                          | 1 (0.99-1.002)               | 0.59    | -                         | -       | 1 (0.99-1.001)             | 0.46    | -                         | -       |
| Donor highest ALT (IU/L)                          | 1 (0.99-1.002)               | 0.64    | -                         | -       | 1 (0.99-1.002)             | 0.40    | -                         | -       |
| Donor hepatitis C virus positivity                | 6.35 (1.55-25.99)            | 0.01    | -                         | -       | 5.35 (1.31-21.81)          | 0.02    | -                         | -       |
| Donor history of arterial hypertension (ref.: no) | 1.57 (0.91-2.74)             | 0.11    | -                         | -       | 1.53 (0.94-2.50)           | 0.09    | -                         | -       |
| Donor history of diabetes (ref.: no)              | 1.19 (0.37-3.86)             | 0.78    | -                         | -       | 1.42 (0.56-3.55)           | 0.50    | -                         | -       |
| Donor cause of death (ref.: others)               | 1                            | 0.51    | -                         | -       | 1                          | 0.45    | -                         | -       |
| Trauma                                            | 0.48 (0.19-1.23)             | 0.13    | -                         | -       | 0.57 (0.24-1.35)           | 0.20    | -                         | -       |
| Cerebrovascular accident                          | 0.59 (0.25-1.40)             | 0.23    | -                         | -       | 0.62 (0.28-1.38)           | 0.24    | -                         | -       |
| Cardiac arrest                                    | 0.81 (0.23-2.88)             | 0.75    | -                         | -       | 0.87 (0.28-2.76)           | 0.82    | -                         | -       |
| Hypoxia                                           | 0.40 (0.11-1.42)             | 0.16    | -                         | -       | 0.34 (0.1-1.17)            | 0.09    | -                         | -       |
| Procurement team (ref.: local)                    | 1                            | 0.11    | -                         | -       | 1                          | 0.32    | -                         | -       |
| Regional                                          | 1.27 (0.70-2.29)             | 0.44    | -                         | -       | 1.33 (0.80-2.21)           | 0.27    | -                         | -       |
| Interregional                                     | 1.83 (1-04-3.22)             | 0.04    | -                         | -       | 1.45 (0.85-2.46)           | 0.17    | -                         | -       |

|                                                       |                  |         |                   |         |                   |         |                  |       |
|-------------------------------------------------------|------------------|---------|-------------------|---------|-------------------|---------|------------------|-------|
| Donor of thoracic organ(s) <sup>f</sup> (ref.: no)    | 1.11 (0.68-1.83) | 0.68    | -                 | -       | 0.80 (0.52-1.23)  | 0.31    | -                | -     |
| HTK preservation solution (ref.: no)                  | 2.08 (1.26-3.42) | 0.004   | 1.84 (1.07-3.15)  | 0.03    | 1.64 (1.03-2.59)  | 0.04    | -                | -     |
| Cold ischemia time <sup>g</sup> (hour)                | 1.11 (0.99-1.24) | 0.05    | -                 | -       | 1.10 (1.003-1.22) | 0.04    | -                | -     |
| Duration of transplantation (hour)                    | 1.09 (0.95-1.25) | 0.08    | -                 | -       | 1.07 (0.94-1.21)  | 0.31    | -                | -     |
| Recipient gender (ref.: male)                         | 0.99 (0.60-1.62) | 0.96    | -                 | -       | 1.02 (0.66-1.58)  | 0.93    | -                | -     |
| Recipient BMI                                         | 1.02 (0.97-1.07) | 0.4     | -                 | -       | 1.02 (0.98-1.07)  | 0.30    | -                | -     |
| Recipient lab MELD score (point)                      | 1.05 (1.02-1.07) | <0.0001 | -                 | -       | 1.05 (1.03-1.07)  | <0.0001 | 1.02 (0.99-1.05) | 0.10  |
| Recipient UNOS score (ref.: home)                     | 1                | 0.004   | 1                 | 0.0001  | 1                 | <0.0001 | 1                | 0.005 |
| ICU                                                   | 4.49 (2.16-9.32) | 0.0001  | 5.37 (2.47-11.67) | 0.00002 | 4.48 (2.42-8.31)  | <0.0001 | 3.43 (1.48-7.95) | 0.004 |
| Ward                                                  | 1.91 (0.87-4.18) | 0.12    | 1.82 (0.80-3.91)  | 0.15    | 1.56 (0.78-3.12)  | 0.21    | 1.06 (0.49-2.32) | 0.88  |
| Continuous care                                       | 1.55 (0.73-3.32) | 0.26    | 1.79 (0.82-3.91)  | 0.15    | 1.32 (0.68-2.56)  | 0.42    | 1.20 (0.61-2.36) | 0.60  |
| Recipient history of arterial hypertension (ref.: no) | 0.97 (0.59-1.58) | 0.90    | -                 | -       | 1.11 (0.72-1.71)  | 0.65    | -                | -     |
| Recipient history of diabetes (ref.: no)              | 1.40 (0.83-2.37) | 0.21    | -                 | -       | 1.47 (0.92-2.34)  | 0.11    | -                | -     |
| Recipient renal replacement therapy (ref.: no)        | 1.93 (0.70-5.33) | 0.21    | -                 | -       | 1.91 (0.77-4.75)  | 0.16    | -                | -     |
| Recipient portal vein thrombosis (ref.: no)           | 0.57 (0.75-3.29) | 0.23    | -                 | -       | 1.57 (0.81-3.04)  | 0.18    | -                | -     |
| Indication                                            |                  |         | -                 | -       |                   |         | -                | -     |
| Post-ethyl cirrhosis                                  | 0.59 (0.29-1.19) | 0.14    | -                 | -       | 0.57 (0.30-1.07)  | 0.08    | -                | -     |
| Post-hepatitis B cirrhosis                            | 1.23 (0.39-3.92) | 0.73    | -                 | -       | 1.32 (0.48-3.59)  | 0.59    | -                | -     |
| Post-hepatitis C cirrhosis                            | 0.93 (0.29-2.97) | 0.91    | -                 | -       | 0.73 (0.23-2.32)  | 0.60    | -                | -     |
| NASH                                                  | 1.15 (0.42-3.17) | 0.78    | -                 | -       | 1.41 (0.62-3.24)  | 0.41    | -                | -     |
| HCC                                                   | 0.97 (0.58-1.64) | 0.91    | -                 | -       | 1.05 (0.53-2.05)  | 0.89    | -                | -     |
| Re-transplantation (no. of transplant)                | 2.04 (1.28-3.23) | 0.002   | 2.21 (1.27-3.86)  | 0.005   | 1.90 (1.23-2.93)  | 0.004   | 1.87 (1.09-3.19) | 0.02  |

Abbreviations: ALT, alanine transferase; AST, aspartate transferase; BMI, body mass index; DCD, donation after circulatory death; HCC, hepatocellular carcinoma; HTK, histidine-tryptophan-ketoglutarate preservation solution; ICU, intensive care unit; MELD, model for end-stage liver disease score; NASH, non-alcoholic steatohepatitis; UNOS: united network for organ sharing score.

---

<sup>a</sup> Results from a multivariate model predicting six months patient survival based on 57 events in 758 subjects. Covariates were retained in the final multivariate model after backwards stepwise selection; donor  $\geq 70$  years, recipient age, and their interaction product were introduced in the model irrespectively from their performance at univariate analysis.

<sup>b</sup> Results from a multivariable model predicting one year patient survival based on 73 events in 764 subjects. Covariates were retained in the final multivariate model after backwards stepwise selection; donor  $\geq 70$  years, recipient age, and their interaction product were introduced in the model irrespectively from their performance at univariate analysis.

<sup>c</sup> Total warm ischemia was defined as the time between withdrawal of therapy and initiation of the cold flush *in situ* during organ procurement.

<sup>d</sup> Functional warm ischemia was defined as the time between the drop of systemic blood pressure below 60 mmHg and initiation of cold flush *in situ* during organ procurement.

<sup>e</sup> Asystolic warm ischemia was defined as the time between the occurrence of circulatory arrest and initiation of cold flush *in situ* during organ procurement.

<sup>f</sup> Donors were considered also donors of thoracic organ(s) when either heart, lungs, heart and lungs were procured.

<sup>g</sup> Cold ischemia was defined as the time between the initiation of the cold flush *in situ* during organ procurement and the liver graft being placed in the recipient abdomen.

**Table S1.** Results from an additive multivariate Cox regression predicting the risk of patient’s death in the subgroup of recipients  $\geq 60$  years.

| <b>Variable</b>                      | <b>HR (95% CI)</b> | <b>P value</b> |
|--------------------------------------|--------------------|----------------|
| Donor age $\geq 70$ years (ref.: no) | 0.66 (0.39-1.11)   | 0.12           |
| Donor of thoracic organs (ref.: no)  | 0.45 (0.30-0.68)   | 0.0002         |
| UNOS (ref.: home)                    | 1                  | 0.01           |
| ICU                                  | 2.91 (1.53-5.52)   | 0.001          |
| Ward                                 | 1.57 (0.91-2.73)   | 0.11           |
| Continuous care                      | 1.42 (0.89-2.28)   | 0.15           |
| HTK preservation solution (ref.: no) | 1.44 (0.96-2.17)   | 0.08           |

Results based on 111 events in 335 subjects. Covariates were retained in the final multivariate model after backwards stepwise selection; donor age  $\geq 70$  years was introduced in the model irrespectively from its performance in univariate analysis.

Abbreviations: HTK, histidine-tryptophan-ketoglutarate preservation solution; UNOS, united network for organ sharing score.

**Table S2.** Results from a multivariate Cox regression predicting the risk of patient’s death after stepwise backwards selection of the final set of covariates and extension of the model with different donor-recipient age matches (D<70/R<70, D<70/R≥70, D≥70/R<70, D≥70/R≥70).

| Variable                               | HR (95%CI)        | p-value |
|----------------------------------------|-------------------|---------|
| Donor age <sup>a</sup> (year)          | 1.003 (0.99-1.01) | 0.52    |
| Recipient age (year)                   | 1.03 (1.02-1.05)  | <0.0001 |
| Age match (ref.: D<70/R<70)            | 1                 | 0.39    |
| D<70/R≥70                              | 1.29 (0.74-2.25)  | 0.37    |
| D≥70/R<70                              | 0.75 (0.46-1.23)  | 0.26    |
| D≥70/R≥70                              | 0.64 (0.27-1.60)  | 0.34    |
| Donor of thoracic organs (ref.: no)    | 0.60 (0.44-0.81)  | 0.001   |
| Re-transplantation (no. of transplant) | 1.76 (1.26-2.47)  | 0.001   |
| UNOS (ref.: home)                      |                   | <0.0001 |
| ICU                                    | 3.46 (2.25-5.34)  | <0.0001 |
| Ward                                   | 1.89 (1.26-2.84)  | 0.002   |
| Continuous care                        | 1.42 (1.001-2.01) | 0.049   |
| HCC (ref.: no)                         | 1.74 (1.26-2.41)  | 0.001   |
| Cold ischemia time (hour)              | 1.10 (1.04-1.17)  | 0.002   |

Results based on 224 events in 763 subjects.

Abbreviations: HCC, hepatocellular carcinoma; UNOS, united network for organ sharing score.

<sup>a</sup> “Donor age ≥70 years” has been replaced to avoid excessive collinearity with the covariate “age match.”

**Table S5.** Results from a multivariate Cox regression predicting the risk of death in recipients of donation after brain-death liver transplant after stepwise backward selection of the final set of covariates.

| <b>Variable</b>                        | <b>HR (95%CI)</b> | <b>p-value</b> |
|----------------------------------------|-------------------|----------------|
| Donor age $\geq$ 70 years (ref.: no)   | 1.42 (0.09-23.12) | 0.81           |
| Recipient age (ref.: <50 years)        | 1.03 (1.01-1.04)  | <0.0001        |
| Age interaction                        | 0.99 (0.95-1.04)  | 0.69           |
| Donor of thoracic organs (ref.: no)    | 0.57 (0.42-0.79)  | 0.001          |
| Re-transplantation (no. of transplant) | 1.78 (1.26-2.50)  | 0.001          |
| UNOS (ref.: home)                      | 1                 | <0.0001        |
| ICU                                    | 3.87 (2.45-6.11)  | <0.0001        |
| Ward                                   | 1.97 (1.26-3.06)  | 0.003          |
| Continuous care                        | 1.49 (1.02-2.16)  | 0.04           |
| HCC (ref.: no)                         | 1.94 (1.38-2.73)  | <0.0001        |
| Cold ischemia time (hour)              | 1.12 (1.05-1.20)  | 0.001          |

Results based on 202 events in 662 subjects.

Abbreviations: HCC, hepatocellular carcinoma; UNOS, united network for organ sharing score.

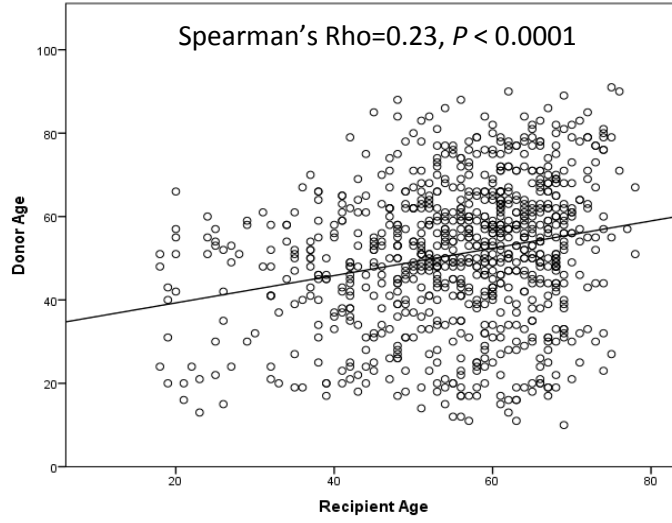

**Figure S1.** Correlation between donor and recipient age: a significant tendency towards matching older donors with older recipients was observed in our center (Spearman's Rho: 0.23,  $P < 0.0001$ ).
